# Supplementary figures and images for: Structure–Functional Examination of Novel Ribonucleoside Hydrolase C (RihC) from Limosilactobacillus reuteri LR1
Source: MDPI journal article supplement (doi:10.3390/ijms25010538), 2023-12-30

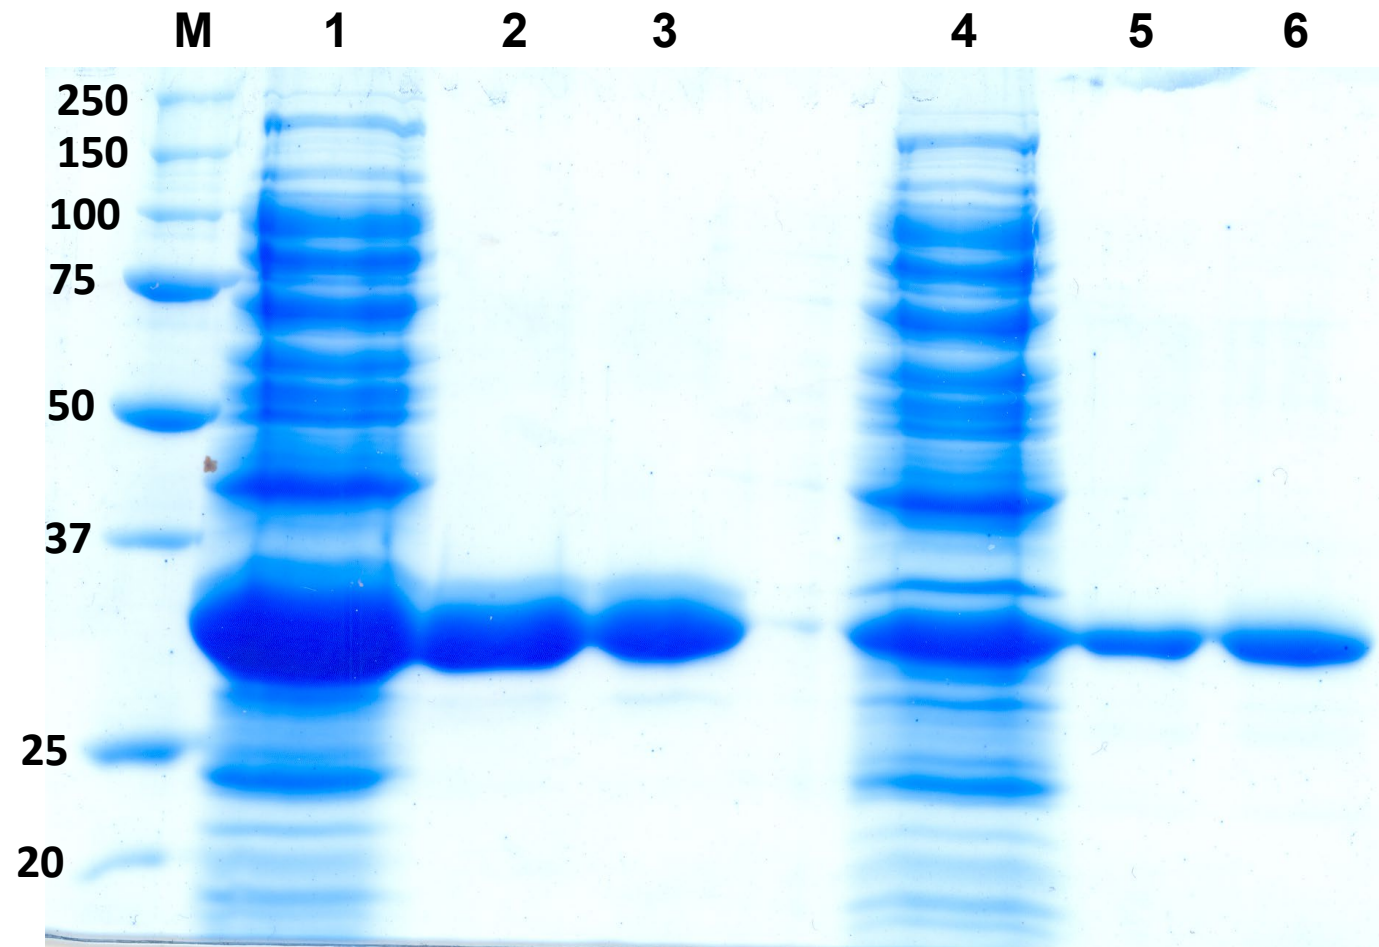

Supplement: s1 [file s1]

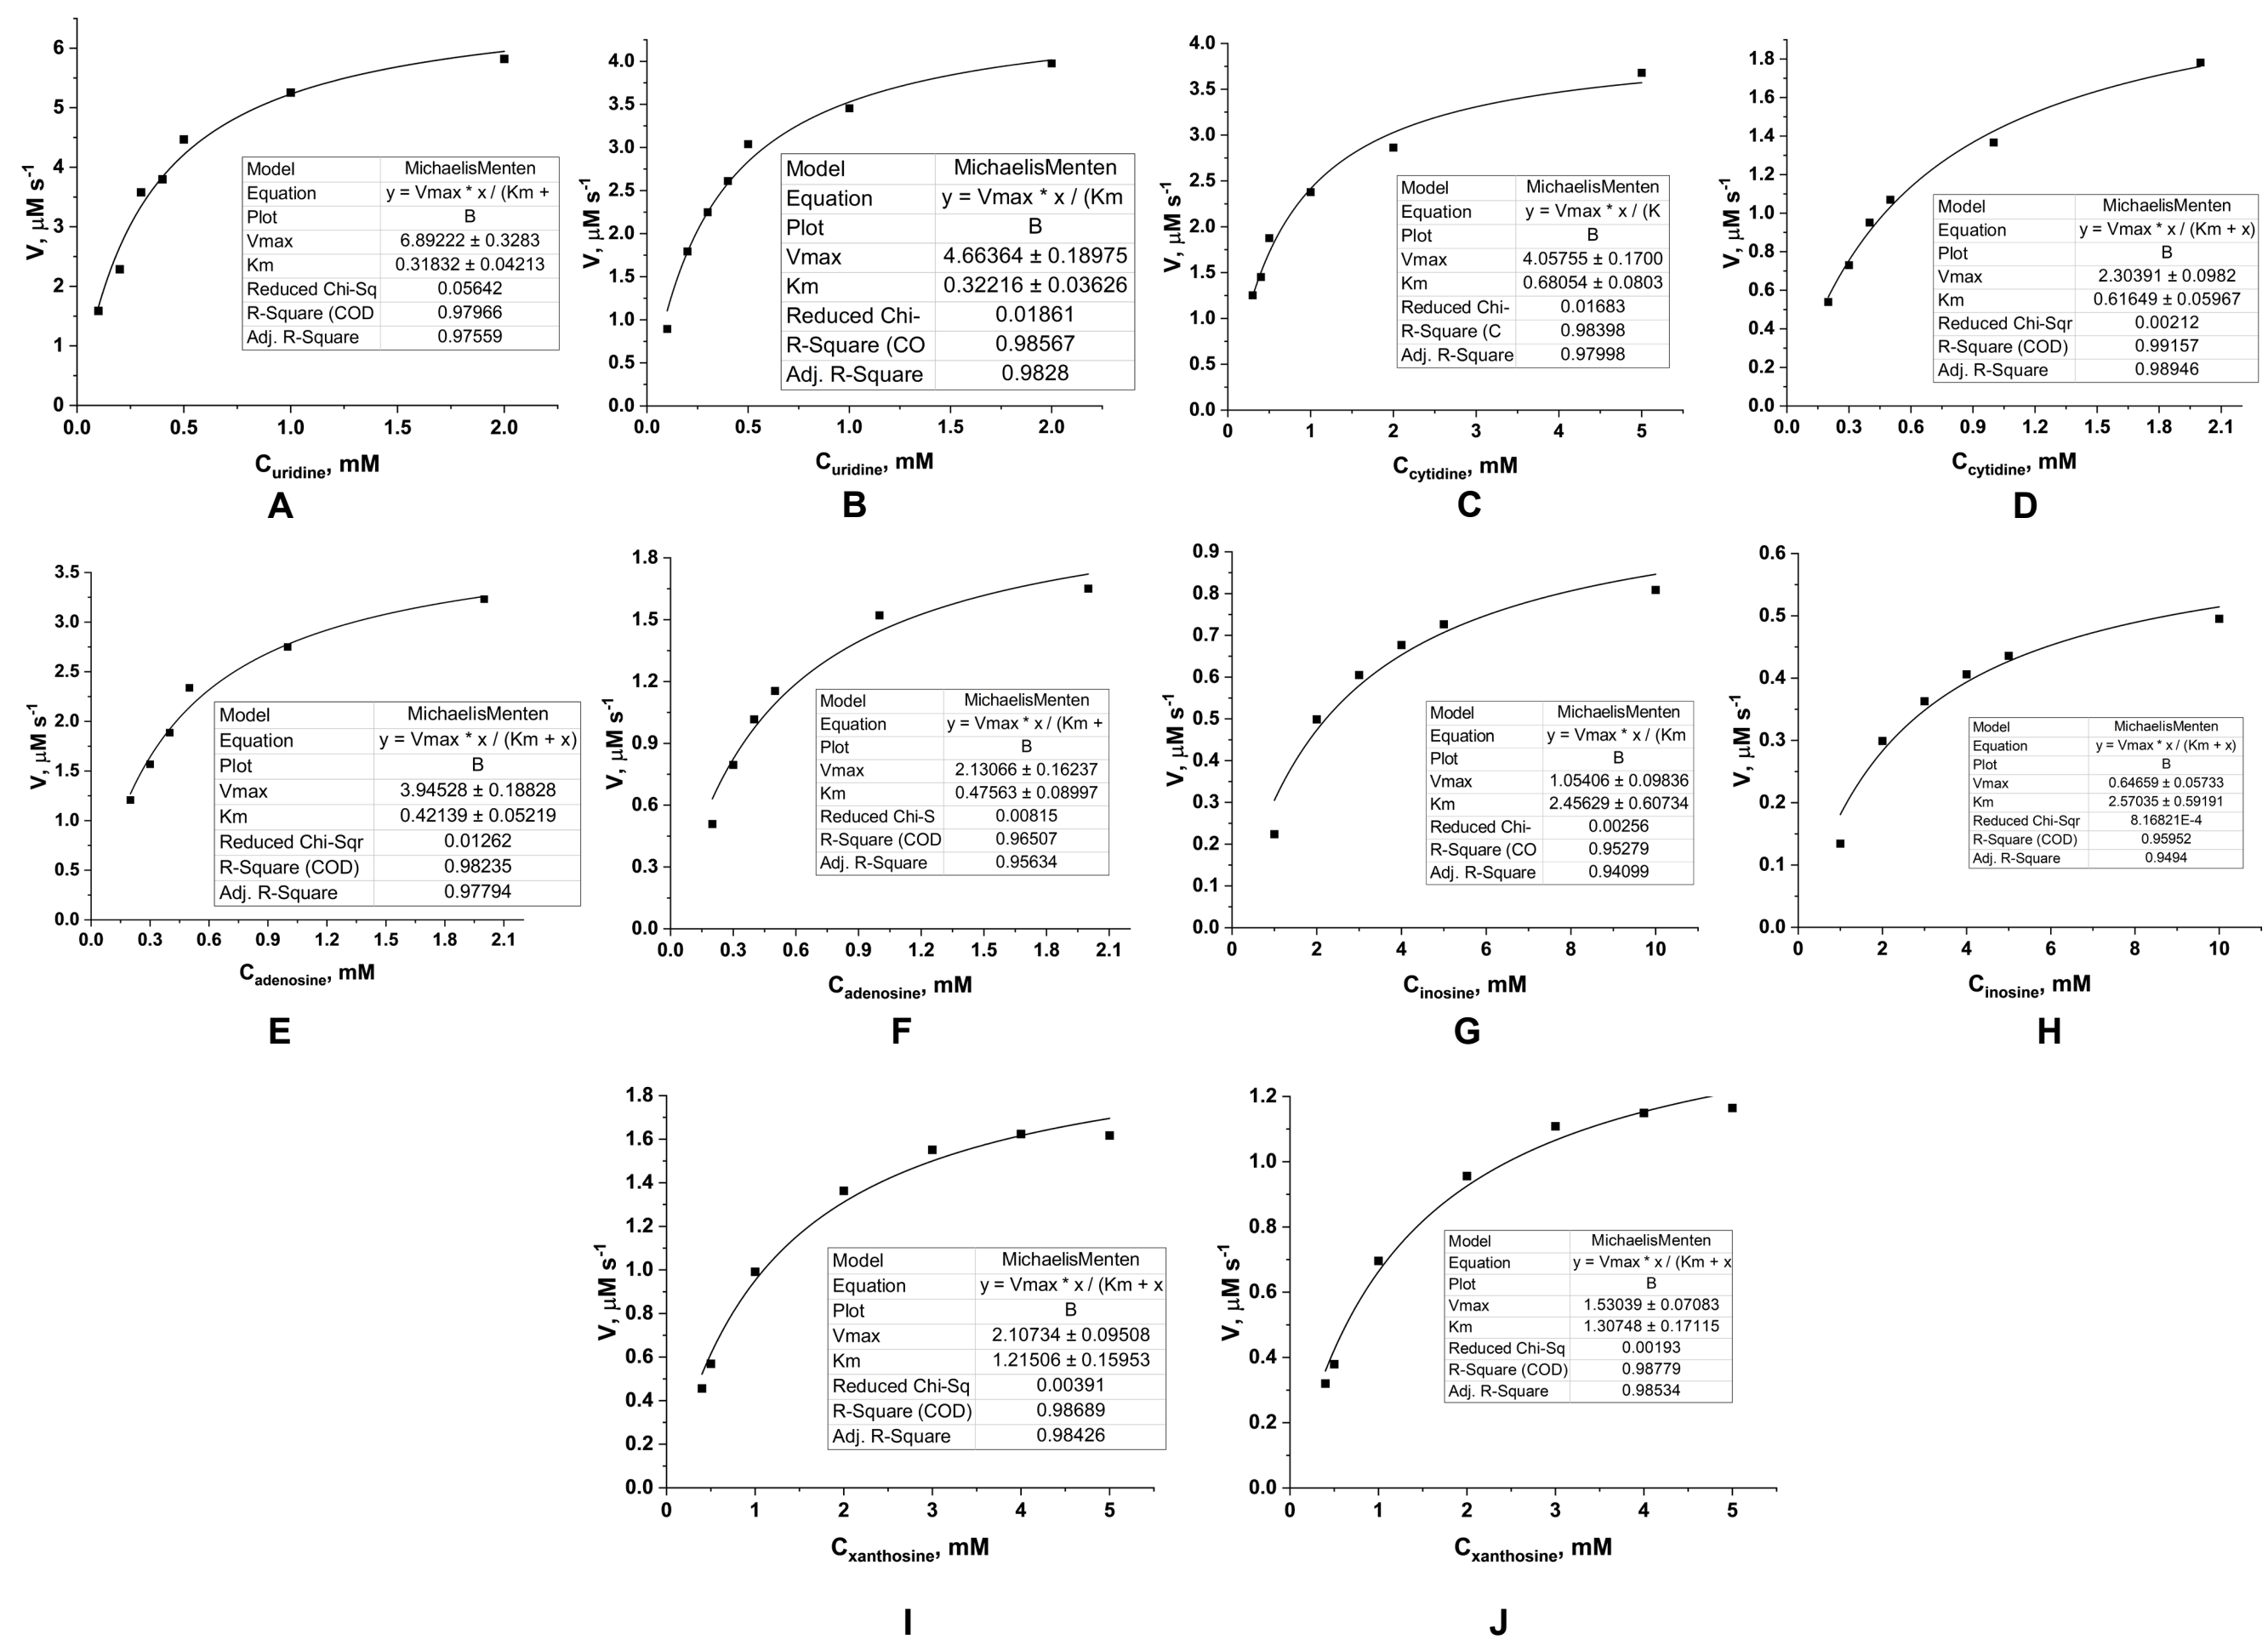

Supplement: s1 [file s1]

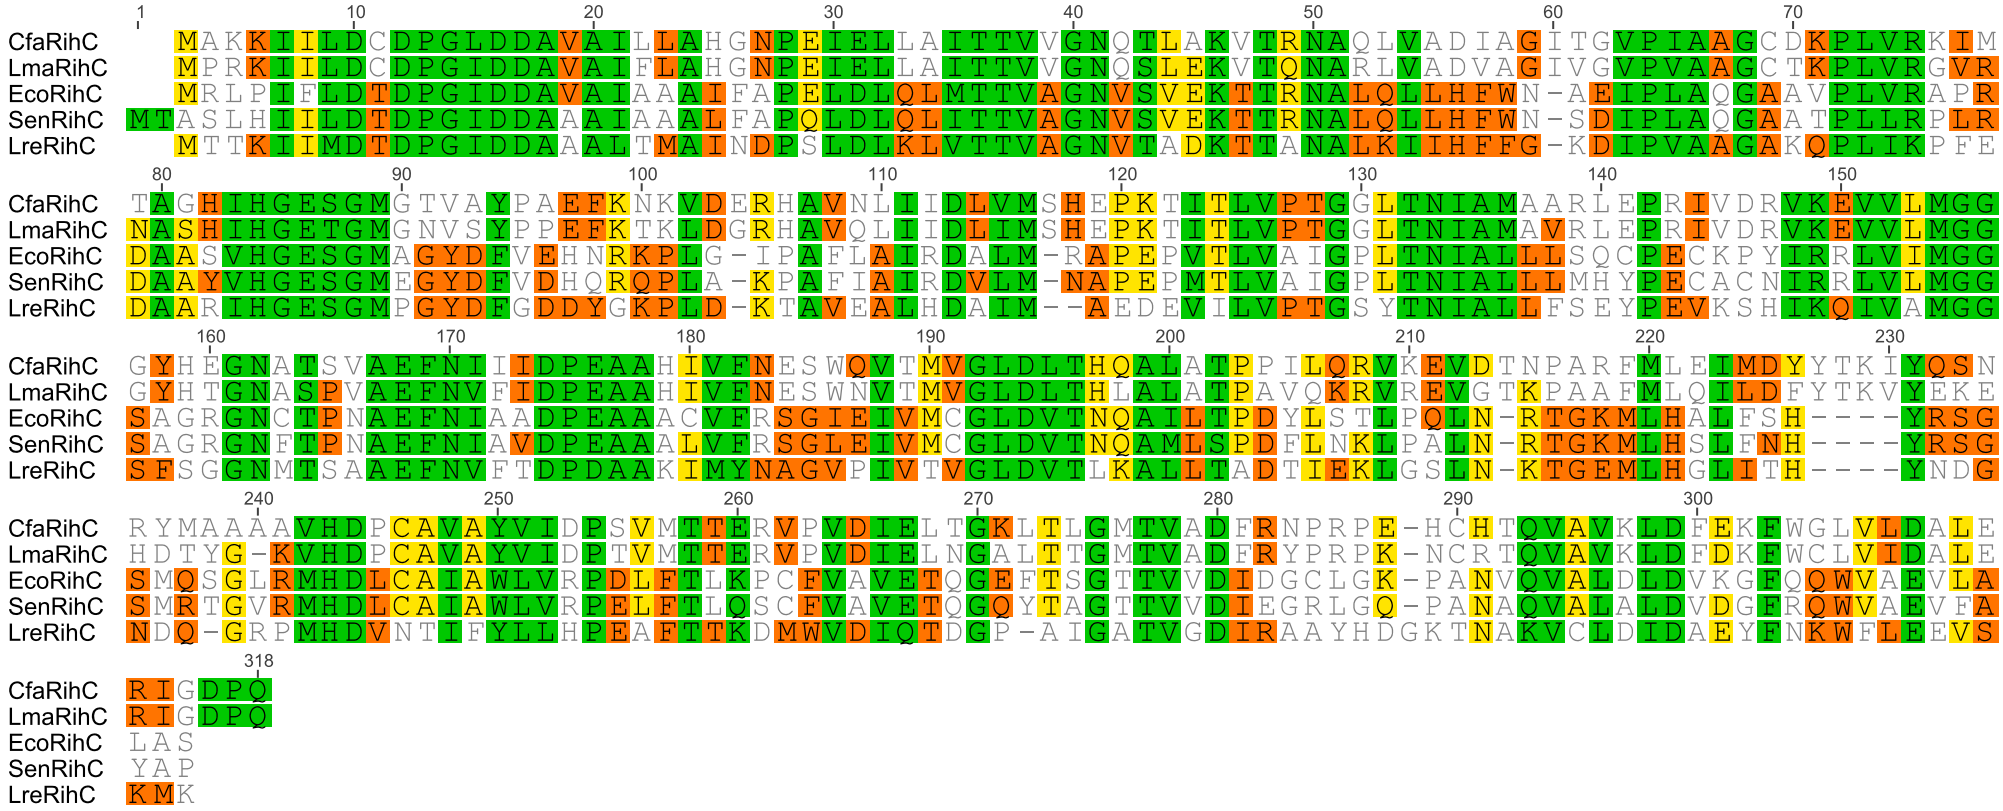

Supplement: s1 [file s1]
